# Supplementary material for: Resolving new ultrastructural features of cytokinetic abscission with soft-X-ray cryo-tomography
Source: PubMed Central journal article supplement (PMC4901327; doi:10.1038/srep27629), 2016-06-10
Supplement: srep27629-s1.pdf [file srep27629-s1.pdf]

# **Resolving new ultrastructural features of cytokinetic abscission with Soft-X-ray cryo-tomography**

Shachar Sherman<sup>1</sup>, David Kirchenbuechler<sup>2</sup>, Dikla Nachmias<sup>1</sup>, Adi  
Tamir<sup>1</sup>, Stephan Werner<sup>3</sup>, Michael Elbaum<sup>2\*</sup> and Natalie Elia<sup>1\*</sup>

<sup>1</sup> Department of Life Sciences and NIBN, Ben Gurion University of the Negev, Beer  
Sheva, Israel

<sup>2</sup> Department of Materials and Interfaces, Weizmann Institute of Science, Rehovot,  
Israel

<sup>3</sup> Helmholtz Zentrum Berlin für Materialien und Energie GmbH, Wilhelm-Conrad-  
Röntgen Campus, Berlin, Germany

Fig S1:

CAAX-GFP, Anti-tubulin

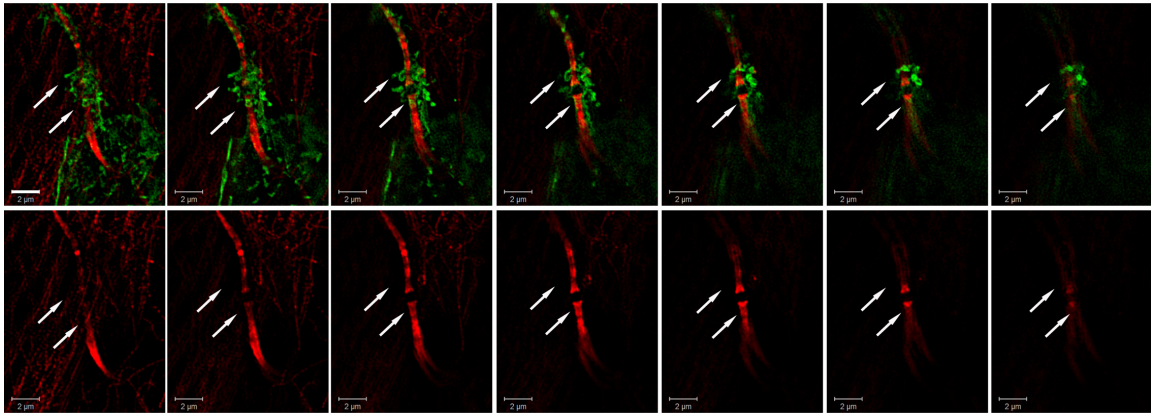

**Fig S1. Visualizing membrane extrusions at constriction sites with SIM**

MDCK cells expressing CAAX-GFP were synchronized, fixed, stained with anti-tubulin antibodies and imaged by SIM. Shown are Z sections of the reconstructed 3D SIM image presented in figure 2d. Upper panel: tubulin and CAAX; lower panel, tubulin alone. Arrows indicates points of membrane extrusions from constriction sites. Scale bar = 2  $\mu\text{m}$ .

Fig S2:

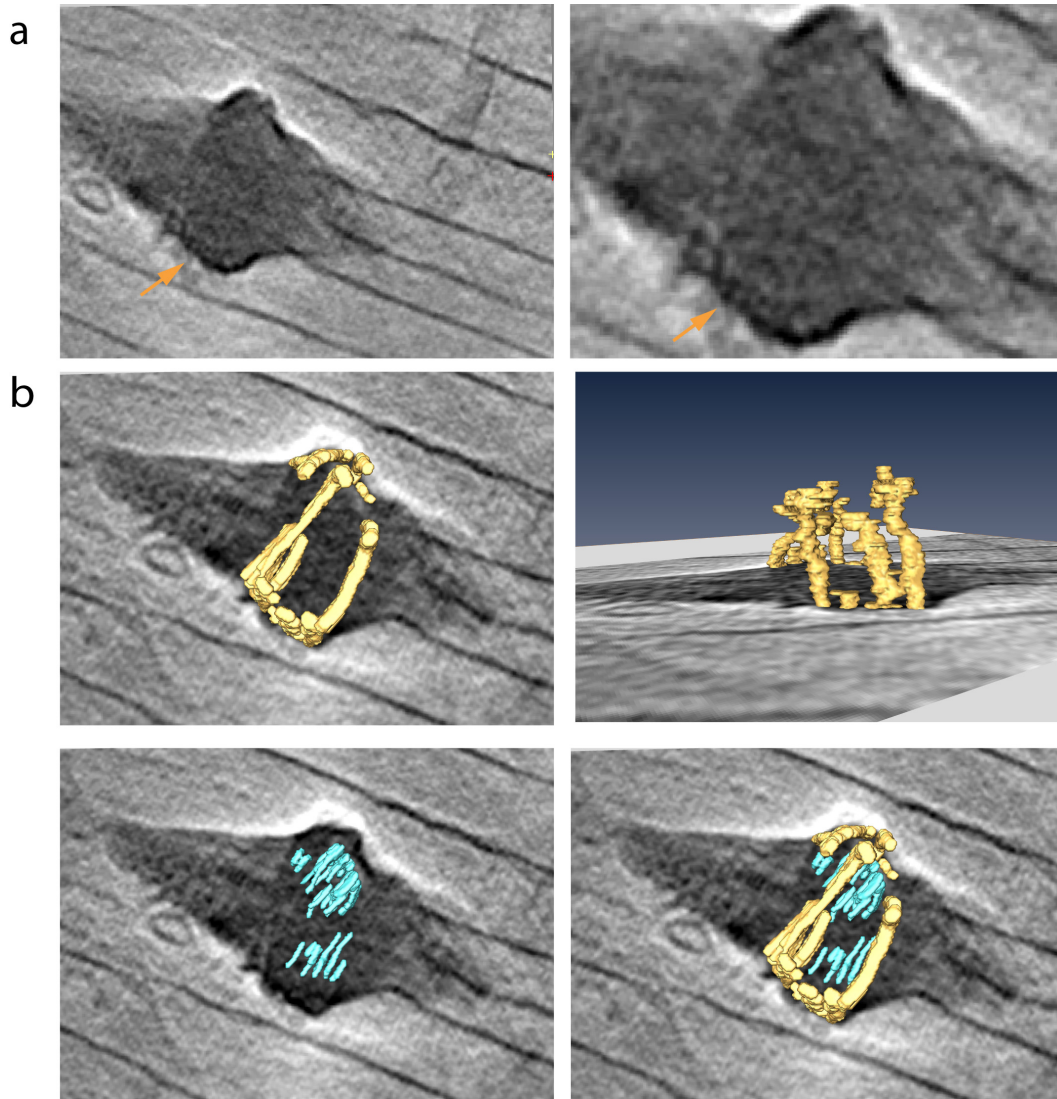

**Fig S2. Resolving filaments at the dark zone in late abscission**

Reconstructed tomographic images and 3D rendering from the dark zone of the intercellular bridge shown in (Fig. 4). (a) Zoomed in images of the dark zone showing observable filaments (see arrows). (b) 3D Rendering of filaments in dark zone. Top panel: cortical filaments (left, top view; right, side view). Lower panel left: internal filaments crossing the dark zone. Lower panel right: overlay of cortical and internal rendered filaments.
